# Supplementary material
Source: PubMed Central journal article supplement (PMC10339100)
Supplement: mfad042_supplemental_file.pdf [file mfad042_supplemental_file.pdf]

# Figure S1

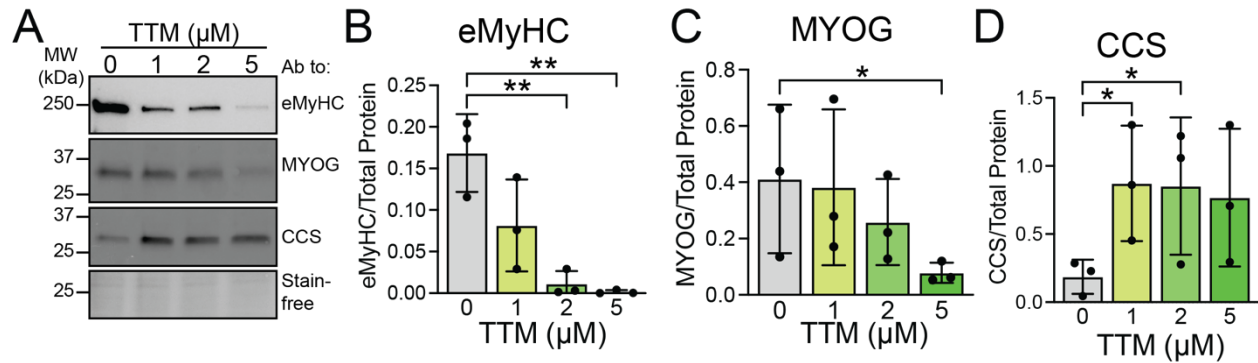

**Supplementary Figure 1: TTM impairs C2C12 myoblast differentiation.** *A*) Immunoblot of lysates from TTM-treated C2C12 myotubes probed with antibodies to eMyHC, myogenin (MYOG), and the Cu chaperone for SOD1 (CCS). Total protein is shown using Stain-free gel imaging technology. Quantification for eMyHC (*B*), MYOG (*C*), and CCS (*D*) as measured by densitometry and normalized to total protein showing significant decreases in MYOG and eMyHC and a significant increase in CCS with TTM treatment. Shown is the mean  $\pm$  standard deviation for  $n = 3-4$  experiments. For all experiments, statistical significance was determined using one-way ANOVA (\*  $p < 0.05$ , \*\*  $p < 0.01$ , \*\*\*  $p < 0.001$ ).

## Figure S2

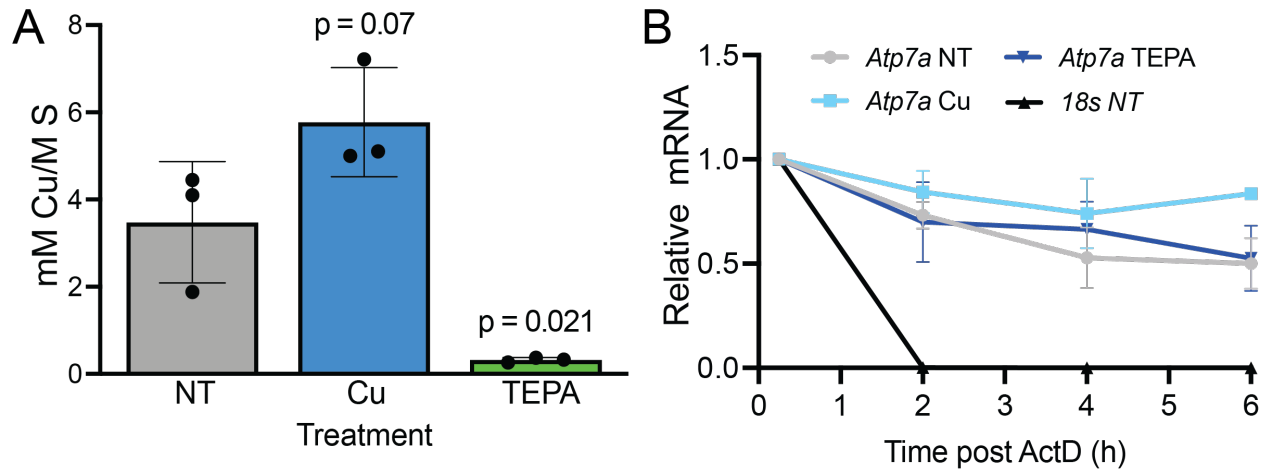

**Supplementary Figure 2: Extended growth in TEPA decreases intracellular Cu and does not affect *Atp7a* RNA stability.** **A)** Levels of Cu (Cu) normalized to sulfur (S) from C2C12 in myoblasts (MB) in normal growth medium (NT) or grown in medium containing 20  $\mu$ M CuSO<sub>4</sub> (Cu) or 20  $\mu$ M TEPA (TEPA) for four days. Values were measured using ICP-OES. **B)** Actinomycin D assay showing that *Atp7a* mRNA is stable in C2C12 myoblasts are grown in the presence of Cu but unstable in normal growth medium or TEPA-treated medium. Shown is mean  $\pm$  standard deviation for n = 3 experiments. Statistical significance was determined by one-way ANOVA.



consensus/80%  
consensus/70%

AC...ssusTTTAGAAGGuAAACAGTTGSAACTGTSTAAAAAGATGTGCCTT/  
AC...ssusTTTAGAAGGuAAACAGTTGSAACTGTSTAAAAAGATGTGCCTT/

cov pid 561  
1 mmAtp7a3pUTR 100.0% 100.0%  
2 hsATP7A3pUTR 84.7% 47.6%  
consensus/100%  
consensus/90%  
consensus/80%  
consensus/70%

. . . . . 6 .  
ATAATTCATGTGTCATTGTCCTTTAGT-----TCCTAAGAGCCTGCAGGATGC  
TTCTCCCTGCATCCTTGTCTTGCAGGTGCTTTTTTAGATGCTCCAATATGTCTT  
sTssssCssssssCsTssCsTssAGs.....TssAsGssCCsusAsGssss  
sTssssCssssssCsTssCsTssAGs.....TssAsGssCCsusAsGssss  
sTssssCssssssCsTssCsTssAGs.....TssAsGssCCsusAsGssss  
sTssssCssssssCsTssCsTssAGs.....TssAsGssCCsusAsGssss

cov pid 641  
1 mmAtp7a3pUTR 100.0% 100.0%  
2 hsATP7A3pUTR 84.7% 47.6%  
consensus/100%  
consensus/90%  
consensus/80%  
consensus/70%

. . . . .  
CCAAGTTTAGGTGGTTTTTCCTTGATAAAAATAACTGACAACAATCACTTGGAA1  
CCAAGTTTAGGTGGTTTTTCATTGATTAATAATAACTGACAACCTGTTCTAATAT1  
CCAAGTTTAGGTGGTTTTTCsTTGATsAAAAssAssssussAssssssCTsusAs1  
CCAAGTTTAGGTGGTTTTTCsTTGATsAAAAssAssssussAssssssCTsusAs1  
CCAAGTTTAGGTGGTTTTTCsTTGATsAAAAssAssssussAssssssCTsusAs1  
CCAAGTTTAGGTGGTTTTTCsTTGATsAAAAssAssssussAssssssCTsusAs1

cov pid 721  
1 mmAtp7a3pUTR 100.0% 100.0%  
2 hsATP7A3pUTR 84.7% 47.6%  
consensus/100%  
consensus/90%  
consensus/80%  
consensus/70%

. . . . .  
GCCA----GACACTAAGACCCTGTCTTAAA--ACATTTTCGTAGCTGGCAGCTCT1  
GCTCAAAGACCTTAAAGGTCTGTAGGGTTCCTGCCTCCCATCTTCCACTGT1  
GCss...GACssTAAuussCTGTssssuss.sCssssTCssAsCTssCsuCTsT1  
GCss...GACssTAAuussCTGTssssuss.sCssssTCssAsCTssCsuCTsT1  
GCss...GACssTAAuussCTGTssssuss.sCssssTCssAsCTssCsuCTsT1  
GCss...GACssTAAuussCTGTssssuss.sCssssTCssAsCTssCsuCTsT1

cov pid 801  
1 mmAtp7a3pUTR 100.0% 100.0%  
2 hsATP7A3pUTR 84.7% 47.6%  
consensus/100%  
consensus/90%  
consensus/80%  
consensus/70%

. . . . .  
CTGTGTCGTTCAGAAGACCATAAGATCTACAGGGTCTGTACCCTCTGTTTCTC  
-----  
.....  
.....  
.....  
.....

cov pid 881  
1 mmAtp7a3pUTR 100.0% 100.0%  
2 hsATP7A3pUTR 84.7% 47.6%  
consensus/100%  
consensus/90%  
consensus/80%  
consensus/70%

. . . . . 9 .  
TTCCTTCAGTTTCCCAGCCCTGTGCTAGCTTTTCAGTTTCAGCTTTGTTCCACAGT/  
TTCCTTCAAGTTTCTAGCTCTGTGCTCAGTTTCAGTTCACTCCTGCCAAGTTGC  
TTCCTTCAusTTsCCsAGCsCTGTGCTsusTTTCAGTTCAssssTGsssAssssu  
TTCCTTCAusTTsCCsAGCsCTGTGCTsusTTTCAGTTCAssssTGsssAssssu  
TTCCTTCAusTTsCCsAGCsCTGTGCTsusTTTCAGTTCAssssTGsssAssssu  
TTCCTTCAusTTsCCsAGCsCTGTGCTsusTTTCAGTTCAssssTGsssAssssu

cov pid 961  
1 mmAtp7a3pUTR 100.0% 100.0%  
2 hsATP7A3pUTR 84.7% 47.6%  
consensus/100%  
consensus/90%  
consensus/80%  
consensus/70%

. . . . . 0 .  
TCTCCAT--CAGTCC--CAGTCGAGAACTTAGAACCTCTCTCACTGAAAAATTCT1  
TGCTGATCTCAGTCTGGAACTTAACATTATGAGCCTTTTCTGCTCAAAAAATT1  
TssssAT..CAGTCs.sAusCssuAsAsTssGAuCCTsTsssuCTsAAAAAsT1  
TssssAT..CAGTCs.sAusCssuAsAsTssGAuCCTsTsssuCTsAAAAAsT1  
TssssAT..CAGTCs.sAusCssuAsAsTssGAuCCTsTsssuCTsAAAAAsT1  
TssssAT..CAGTCs.sAusCssuAsAsTssGAuCCTsTsssuCTsAAAAAsT1

cov pid 1041  
1 mmAtp7a3pUTR 100.0% 100.0%  
2 hsATP7A3pUTR 84.7% 47.6%  
consensus/100%  
consensus/90%  
consensus/80%  
consensus/70%

. . . . .  
CATATACGGGCCATAGAAAAGTATGTGGTCTCATTAATTCATCTTTTGGGATA1  
CATATACAGGTCATATAAAATTACCTGGATTCACTAAATTTGTTTGTGTTGTT  
CATATACuGGsCATAsAAAAAsTssTGGssTCAstAAATTSuTsTssTssuTs  
CATATACuGGsCATAsAAAAAsTssTGGssTCAstAAATTSuTsTssTssuTs  
CATATACuGGsCATAsAAAAAsTssTGGssTCAstAAATTSuTsTssTssuTs  
CATATACuGGsCATAsAAAAAsTssTGGssTCAstAAATTSuTsTssTssuTs

|                |        |        |      |          |           |            |            |                    |                    |           |
|----------------|--------|--------|------|----------|-----------|------------|------------|--------------------|--------------------|-----------|
|                | cov    | pid    | 1121 | .        | .         | :          | .          | .                  |                    |           |
| 1 mmAtp7a3pUTR | 100.0% | 100.0% |      | ---TCAC  | TTGGCTGGT | ATATTATA   | AATTTAATA  | AAAATTTT           | AGTCGCCTCTGTTTTAA/ |           |
| 2 hsATP7A3pUTR | 84.7%  | 47.6%  |      | AGAGTCTT | GTTTTGCAG | CCCAGGCTGG | AGTGCAGTGG | CACCATCTTGGCTCACT( |                    |           |
| consensus/100% |        |        |      | ..       | sssCTTG   | ssTsGs     | AssssAsusT | ssAuTusAuT         | ssssAssssCsT       | ssstssssu |
| consensus/90%  |        |        |      | ..       | sssCTTG   | ssTsGs     | AssssAsusT | ssAuTusAuT         | ssssAssssCsT       | ssstssssu |
| consensus/80%  |        |        |      | ..       | sssCTTG   | ssTsGs     | AssssAsusT | ssAuTusAuT         | ssssAssssCsT       | ssstssssu |
| consensus/70%  |        |        |      | ..       | sssCTTG   | ssTsGs     | AssssAsusT | ssAuTusAuT         | ssssAssssCsT       | ssstssssu |

|                |        |        |      |           |           |           |          |                       |     |
|----------------|--------|--------|------|-----------|-----------|-----------|----------|-----------------------|-----|
|                | cov    | pid    | 1201 | .         | .         | .         | .        | :                     |     |
| 1 mmAtp7a3pUTR | 100.0% | 100.0% |      | TATTCTCAT | -----     | -----     | -----    | -----                 | CG( |
| 2 hsATP7A3pUTR | 84.7%  | 47.6%  |      | AATTCTCC  | CTGCCTCAG | CCTCCTGAG | TAGCTAGG | ATTACAGGTGCCTGCCACCA( |     |
| consensus/100% |        |        |      | s         | ATTCTC    | ss.....   | .....    | .....                 | Cu( |
| consensus/90%  |        |        |      | s         | ATTCTC    | ss.....   | .....    | .....                 | Cu( |
| consensus/80%  |        |        |      | s         | ATTCTC    | ss.....   | .....    | .....                 | Cu( |
| consensus/70%  |        |        |      | s         | ATTCTC    | ss.....   | .....    | .....                 | Cu( |

|                |        |        |      |          |          |           |            |                     |          |        |
|----------------|--------|--------|------|----------|----------|-----------|------------|---------------------|----------|--------|
|                | cov    | pid    | 1281 | .        | 3        | .         | .          | .                   |          |        |
| 1 mmAtp7a3pUTR | 100.0% | 100.0% |      | -----    | -----    | -----     | -----      | TACACACCAA          | ACTGTAA/ |        |
| 2 hsATP7A3pUTR | 84.7%  | 47.6%  |      | GTAGAGAC | GGGGTTTC | GCATGTTGG | CTAGCCTGGT | CTTAAACTCCTAACCTCA( |          |        |
| consensus/100% |        |        |      | .....    | .....    | .....     | .....      | TASAC               | sCCsAAC  | ssssAu |
| consensus/90%  |        |        |      | .....    | .....    | .....     | .....      | TASAC               | sCCsAAC  | ssssAu |
| consensus/80%  |        |        |      | .....    | .....    | .....     | .....      | TASAC               | sCCsAAC  | ssssAu |
| consensus/70%  |        |        |      | .....    | .....    | .....     | .....      | TASAC               | sCCsAAC  | ssssAu |

|                |        |        |      |          |           |           |            |                       |                |             |
|----------------|--------|--------|------|----------|-----------|-----------|------------|-----------------------|----------------|-------------|
|                | cov    | pid    | 1361 | .        | .         | .         | 4          | .                     |                |             |
| 1 mmAtp7a3pUTR | 100.0% | 100.0% |      | AAATCAGA | AATATTCCT | GGTTTATG  | ATATCTT--- | GTAGTTA               | AGTATGTTGTTCT( |             |
| 2 hsATP7A3pUTR | 84.7%  | 47.6%  |      | AAGTGC   | TGGGATTAC | AGGTGTGAG | CCTCCATGCC | CAGCCTAAATTTGTATTTTTT |                |             |
| consensus/100% |        |        |      | AAuT     | sssuus    | ATTsCs    | GGTstus    | GssssCsT...           | ssusTAAuT      | sTGTssTTsTs |
| consensus/90%  |        |        |      | AAuT     | sssuus    | ATTsCs    | GGTstus    | GssssCsT...           | ssusTAAuT      | sTGTssTTsTs |
| consensus/80%  |        |        |      | AAuT     | sssuus    | ATTsCs    | GGTstus    | GssssCsT...           | ssusTAAuT      | sTGTssTTsTs |
| consensus/70%  |        |        |      | AAuT     | sssuus    | ATTsCs    | GGTstus    | GssssCsT...           | ssusTAAuT      | sTGTssTTsTs |

|                |        |        |      |          |          |           |           |                       |
|----------------|--------|--------|------|----------|----------|-----------|-----------|-----------------------|
|                | cov    | pid    | 1441 | :        | .        | .         | .         | .                     |
| 1 mmAtp7a3pUTR | 100.0% | 100.0% |      | TGTTTA   | -----    | -----     | -----     | -----                 |
| 2 hsATP7A3pUTR | 84.7%  | 47.6%  |      | TATATATA | AATTTAAT | AGATTTTAT | TTTATCTTT | AGTGTTCAGATAACCTCTCA/ |
| consensus/100% |        |        |      | TuT      | sTA..... | .....     | .....     | .....                 |
| consensus/90%  |        |        |      | TuT      | sTA..... | .....     | .....     | .....                 |
| consensus/80%  |        |        |      | TuT      | sTA..... | .....     | .....     | .....                 |
| consensus/70%  |        |        |      | TuT      | sTA..... | .....     | .....     | .....                 |

|                |        |        |      |          |          |         |          |                         |
|----------------|--------|--------|------|----------|----------|---------|----------|-------------------------|
|                | cov    | pid    | 1521 | .        | .        | :       | .        | .                       |
| 1 mmAtp7a3pUTR | 100.0% | 100.0% |      | -----    | -----    | -----   | -----    | -----                   |
| 2 hsATP7A3pUTR | 84.7%  | 47.6%  |      | ACAAAGCT | GCATTTAC | CAAAAAA | TACAGTAA | AATCATAATACAGAAACTAAAAT |
| consensus/100% |        |        |      | .....    | .....    | .....   | .....    | .....                   |
| consensus/90%  |        |        |      | .....    | .....    | .....   | .....    | .....                   |
| consensus/80%  |        |        |      | .....    | .....    | .....   | .....    | .....                   |
| consensus/70%  |        |        |      | .....    | .....    | .....   | .....    | .....                   |

|                |        |        |      |          |          |          |        |                      |
|----------------|--------|--------|------|----------|----------|----------|--------|----------------------|
|                | cov    | pid    | 1601 | .        | .        | .        | .      | :                    |
| 1 mmAtp7a3pUTR | 100.0% | 100.0% |      | -----    | -----    | -----    | -----  | -----                |
| 2 hsATP7A3pUTR | 84.7%  | 47.6%  |      | TAAATATA | CTCTCTAG | TTTAAAAC | ATTTGA | ACTTGCCTAGTTAGTGTGGT |
| consensus/100% |        |        |      | .....    | .....    | .....    | .....  | .....                |
| consensus/90%  |        |        |      | .....    | .....    | .....    | .....  | .....                |
| consensus/80%  |        |        |      | .....    | .....    | .....    | .....  | .....                |
| consensus/70%  |        |        |      | .....    | .....    | .....    | .....  | .....                |

|                |        |        |      |         |         |         |         |                            |
|----------------|--------|--------|------|---------|---------|---------|---------|----------------------------|
|                | cov    | pid    | 1681 | .       | 7       | .       | .       | .                          |
| 1 mmAtp7a3pUTR | 100.0% | 100.0% |      | -----   | -----   | -----   | -----   | -----                      |
| 2 hsATP7A3pUTR | 84.7%  | 47.6%  |      | TTGCCAA | ATGGATT | TAGAAAT | CCCTTGT | GAGTGCCTGGTAGCTAATACACTGGT |
| consensus/100% |        |        |      | .....   | .....   | .....   | .....   | .....                      |
| consensus/90%  |        |        |      | .....   | .....   | .....   | .....   | .....                      |
| consensus/80%  |        |        |      | .....   | .....   | .....   | .....   | .....                      |
| consensus/70%  |        |        |      | .....   | .....   | .....   | .....   | .....                      |

```

consensus/100% .....
consensus/90% .....
consensus/80% .....
consensus/70% .....

```

```

                cov   pid 1761      .      .      .      .      .      .      .
1 mmAtp7a3pUTR 100.0% 100.0% -----
2 hsATP7A3pUTR 84.7%  47.6% TTTAAATTTCTTTGTTAGTTGCAAGATGGATTTTCATATGCAGAATATGTAATG/
consensus/100% .....
consensus/90% .....
consensus/80% .....
consensus/70% .....

```

```

                cov   pid 1841      :      .      .      .      .      .
1 mmAtp7a3pUTR 100.0% 100.0% TCTTTTATTTTCATGACTT-----TAAGCTACTA--GCATAATGTCTAACAT
2 hsATP7A3pUTR 84.7%  47.6% CATTTTGTCCATTACCAGAAGCAAAGCTGCTGCTAACCCAACATCTGGCACA1
consensus/100% ssTTTTuTTssCATsssC...sssGCTuCTA..sCAssATsTsssACA1
consensus/90%  ssTTTTuTTssCATsssC...sssGCTuCTA..sCAssATsTsssACA1
consensus/80%  ssTTTTuTTssCATsssC...sssGCTuCTA..sCAssATsTsssACA1
consensus/70%  ssTTTTuTTssCATsssC...sssGCTuCTA..sCAssATsTsssACA1

```

```

                cov   pid 1921      .      .      .      .      .
1 mmAtp7a3pUTR 100.0% 100.0% --CATTCTCCTTTTCAAGTCAATATTGAGTATAAAAATCATGTTTTATATTAC-
2 hsATP7A3pUTR 84.7%  47.6% TTCTTTTCTCCCCTTGAGGTGAGTAATAAATACAAAAAATCATTTTCTAGAG(
consensus/100% ..CsTTTCTCCssTTsAuGTCaUTAsTuAuTASAAAAAsssUTTTTsssssAs.
consensus/90%  ..CsTTTCTCCssTTsAuGTCaUTAsTuAuTASAAAAAsssUTTTTsssssAs.
consensus/80%  ..CsTTTCTCCssTTsAuGTCaUTAsTuAuTASAAAAAsssUTTTTsssssAs.
consensus/70%  ..CsTTTCTCCssTTsAuGTCaUTAsTuAuTASAAAAAsssUTTTTsssssAs.

```

```

                cov   pid 2001      .      .      .      .      .
1 mmAtp7a3pUTR 100.0% 100.0% GGAGAAATGGGTTTTGTCCACTCCACCCTTTTCTCTCTTATTCTTTACACCCCA/
2 hsATP7A3pUTR 84.7%  47.6% GGGGATGGAGTTCCTCCTTTCTACCCCTTTTCTCTTTTATCCTTTTCATATATA(
consensus/100% GGuGAssGuGTTsTssCssssCsACCsCTTTTCTCTsTTATsCsTTCAsAsssAs
consensus/90%  GGuGAssGuGTTsTssCssssCsACCsCTTTTCTCTsTTATsCsTTCAsAsssAs
consensus/80%  GGuGAssGuGTTsTssCssssCsACCsCTTTTCTCTsTTATsCsTTCAsAsssAs
consensus/70%  GGuGAssGuGTTsTssCssssCsACCsCTTTTCTCTsTTATsCsTTCAsAsssAs

```

```

                cov   pid 2081      .      1      .      .      .
1 mmAtp7a3pUTR 100.0% 100.0% AATGCTGTCTTTCCAGATTTGGAAAAGACCTAACTTCTATCTTAGCTAT----C1
2 hsATP7A3pUTR 84.7%  47.6% CATGCTGT-CTTTAGATTTAGAAAAGATCTAATTTCTGTCTCAGCTGTCTTAA/
consensus/100% sATGCTGT.sTTsCAGATTTuGAAAAGAsCTAAStTCTuTCTsAGCTuT...ss
consensus/90%  sATGCTGT.sTTsCAGATTTuGAAAAGAsCTAAStTCTuTCTsAGCTuT...ss
consensus/80%  sATGCTGT.sTTsCAGATTTuGAAAAGAsCTAAStTCTuTCTsAGCTuT...ss
consensus/70%  sATGCTGT.sTTsCAGATTTuGAAAAGAsCTAAStTCTuTCTsAGCTuT...ss

```

```

                cov   pid 2161      .      .      2      .
1 mmAtp7a3pUTR 100.0% 100.0% GTGCTATTAATCTAGAAAGGCAAACCTGTTTTAATGAAGTATGAATAAGTTTAT/
2 hsATP7A3pUTR 84.7%  47.6% GTGCTATTAATCTAGAAAGGCAAACCCATTTCACTGAAATATCAATGGGTTTGC/
consensus/100% GTGCTATTAATCTAGAAAGGCAAACCsuTTTsAsTGAauTATsAATuuGTTTus/
consensus/90%  GTGCTATTAATCTAGAAAGGCAAACCsuTTTsAsTGAauTATsAATuuGTTTus/
consensus/80%  GTGCTATTAATCTAGAAAGGCAAACCsuTTTsAsTGAauTATsAATuuGTTTus/
consensus/70%  GTGCTATTAATCTAGAAAGGCAAACCsuTTTsAsTGAauTATsAATuuGTTTus/

```

```

                cov   pid 2241      :      .      .      .      .
1 mmAtp7a3pUTR 100.0% 100.0% TACTTATGCCGTCTTAAGAGTT-----TGAGTTTGTATATTTGTTTC-TTAA1
2 hsATP7A3pUTR 84.7%  47.6% TGCCTATGCCATCTCCATGCTTTGAGTTTGTATATTTATTTATTTTAA1
consensus/100% TuCsTATGCCuTcsTssusGsT.....TGAGTTTsssTATTTuTss.TTAA1
consensus/90%  TuCsTATGCCuTcsTssusGsT.....TGAGTTTsssTATTTuTss.TTAA1
consensus/80%  TuCsTATGCCuTcsTssusGsT.....TGAGTTTsssTATTTuTss.TTAA1

```

|                |        |        |                                                          |
|----------------|--------|--------|----------------------------------------------------------|
| consensus/70%  |        |        | TuCsTATGCCuTCsTssusGsT.....TGAGTTTsssTATTTuTTss.TTAA1    |
|                | cov    | pid    | 2321                                                     |
| 1 mmAtp7a3pUTR | 100.0% | 100.0% | CA-TTGGCTTCTAGAAGAGAGAGCTAAACTAT-AGATGTCCAGTAGTT----TT1  |
| 2 hsATP7A3pUTR | 84.7%  | 47.6%  | CTTGTTCCTTCTAGAAGACAGAGCTGATAGGGTAAATGTTGAAAAAGAAGCAT(   |
| consensus/100% |        |        | Cs.sTssCTTCTAGAAGAsAGAGCTuAsssus.AuATGTssAusAuss....sTs  |
| consensus/90%  |        |        | Cs.sTssCTTCTAGAAGAsAGAGCTuAsssus.AuATGTssAusAuss....sTs  |
| consensus/80%  |        |        | Cs.sTssCTTCTAGAAGAsAGAGCTuAsssus.AuATGTssAusAuss....sTs  |
| consensus/70%  |        |        | Cs.sTssCTTCTAGAAGAsAGAGCTuAsssus.AuATGTssAusAuss....sTs  |
|                | cov    | pid    | 2401                                                     |
| 1 mmAtp7a3pUTR | 100.0% | 100.0% | AAGTCCCCCAGTCGTCAGCCAGTTTCTCCTTCTGTTCTGTATATGTTGTTGAGT(  |
| 2 hsATP7A3pUTR | 84.7%  | 47.6%  | AAGCA--GTTGAACACAGCCAGTTATTCTTCCATTATTATGTGTACCTTGGAGT(  |
| consensus/100% |        |        | AAGss..sssGssssCAGCCAGTTsstCsTsCsstSstTuTuTuTusssTsGAGT( |
| consensus/90%  |        |        | AAGss..sssGssssCAGCCAGTTsstCsTsCsstSstTuTuTuTusssTsGAGT( |
| consensus/80%  |        |        | AAGss..sssGssssCAGCCAGTTsstCsTsCsstSstTuTuTuTusssTsGAGT( |
| consensus/70%  |        |        | AAGss..sssGssssCAGCCAGTTsstCsTsCsstSstTuTuTuTusssTsGAGT( |
|                | cov    | pid    | 2481                                                     |
| 1 mmAtp7a3pUTR | 100.0% | 100.0% | ATAGGGCAGT-----5-----GAGAACAGCATTTC                      |
| 2 hsATP7A3pUTR | 84.7%  | 47.6%  | GTGGGACAGTGGGAATAGCAGCTTGTAGTATTGAAATAATCAAAGAGATAATTC   |
| consensus/100% |        |        | uTuGGuCAGT.....uAuuAsAssATTT(                            |
| consensus/90%  |        |        | uTuGGuCAGT.....uAuuAsAssATTT(                            |
| consensus/80%  |        |        | uTuGGuCAGT.....uAuuAsAssATTT(                            |
| consensus/70%  |        |        | uTuGGuCAGT.....uAuuAsAssATTT(                            |
|                | cov    | pid    | 2561                                                     |
| 1 mmAtp7a3pUTR | 100.0% | 100.0% | GTTG--GAGA-----6-----                                    |
| 2 hsATP7A3pUTR | 84.7%  | 47.6%  | ATGCTAATTAGAAAAAGTCTGCTTTAAGTAATATGTAGCCACATTTGAATCCT(   |
| consensus/100% |        |        | uTss..ussA.....                                          |
| consensus/90%  |        |        | uTss..ussA.....                                          |
| consensus/80%  |        |        | uTss..ussA.....                                          |
| consensus/70%  |        |        | uTss..ussA.....                                          |
|                | cov    | pid    | 2641                                                     |
| 1 mmAtp7a3pUTR | 100.0% | 100.0% | -----GAGGCTGTATTCCTTAGAGAGGAGGGTCTTTT/                   |
| 2 hsATP7A3pUTR | 84.7%  | 47.6%  | GAACTTTCATTAGCTTCAAAGAGAAGCTGTATTTACAGGAGAAAGAGG-TGATT/  |
| consensus/100% |        |        | .....GAUGCTGTATTssssuGAGAUuuuuGG.sssTT/                  |
| consensus/90%  |        |        | .....GAUGCTGTATTssssuGAGAUuuuuGG.sssTT/                  |
| consensus/80%  |        |        | .....GAUGCTGTATTssssuGAGAUuuuuGG.sssTT/                  |
| consensus/70%  |        |        | .....GAUGCTGTATTssssuGAGAUuuuuGG.sssTT/                  |
|                | cov    | pid    | 2721                                                     |
| 1 mmAtp7a3pUTR | 100.0% | 100.0% | CAGTTGGCCACTGGTTTAA-GTAATGGGCCACTGCTCAGAACAGGTTTTGTAAAG1 |
| 2 hsATP7A3pUTR | 84.7%  | 47.6%  | CAGTTAGTAGCTAGCTTTAAGTCAGGAGTTAGT---A-----ATGAGAAAT1     |
| consensus/100% |        |        | CAGTTuGssuCTuGsTTsA.GTsAsGuGssAsT...s.....sTssGsAAs1     |
| consensus/90%  |        |        | CAGTTuGssuCTuGsTTsA.GTsAsGuGssAsT...s.....sTssGsAAs1     |
| consensus/80%  |        |        | CAGTTuGssuCTuGsTTsA.GTsAsGuGssAsT...s.....sTssGsAAs1     |
| consensus/70%  |        |        | CAGTTuGssuCTuGsTTsA.GTsAsGuGssAsT...s.....sTssGsAAs1     |
|                | cov    | pid    | 2801                                                     |
| 1 mmAtp7a3pUTR | 100.0% | 100.0% | TATATACACATGTATATACACACACACATACATGCATACAGAGAGAGACAGCC    |
| 2 hsATP7A3pUTR | 84.7%  | 47.6%  | CACATACATATAT--ATATACACACATATATATGTACATACACATACATACATA1  |
| consensus/100% |        |        | sAsATACAsATuT..ATAsACACACAsAsATAsuTuCATACAsAsAsACAsSs    |
| consensus/90%  |        |        | sAsATACAsATuT..ATAsACACACAsAsATAsuTuCATACAsAsAsACAsSs    |
| consensus/80%  |        |        | sAsATACAsATuT..ATAsACACACAsAsATAsuTuCATACAsAsAsACAsSs    |
| consensus/70%  |        |        | sAsATACAsATuT..ATAsACACACAsAsATAsuTuCATACAsAsAsACAsSs    |
|                | cov    | pid    | 2881                                                     |
|                |        |        | 9                                                        |





consensus/90% TTTsTGTGsuTGAGGCATCTGGTTAssGsTTAsssTussss.....  
 consensus/80% TTTsTGTGsuTGAGGCATCTGGTTAssGsTTAsssTussss.....  
 consensus/70% TTTsTGTGsuTGAGGCATCTGGTTAssGsTTAsssTussss.....

cov pid 3521  
 1 mmAtp7a3pUTR 100.0% 100.0% CCCTCTTCCTTCTCTTCTTCTCCTTTTATAACAGACATTCCCTCATAATCA  
 2 hsATP7A3pUTR 84.7% 47.6% -----GAATAAAGACATTCCCTGGAATCAC1  
 consensus/100% .....ssATASAGACATTCCCTsusAsssss:  
 consensus/90% .....ssATASAGACATTCCCTsusAsssss:  
 consensus/80% .....ssATASAGACATTCCCTsusAsssss:  
 consensus/70% .....ssATASAGACATTCCCTsusAsssss:

cov pid 3601  
 1 mmAtp7a3pUTR 100.0% 100.0% ATTAaaaaaacataCTTCTTTACAAATATCGATAGATAGATAGATAGATA  
 2 hsATP7A3pUTR 84.7% 47.6% -----TTTCTTTCTAC-----  
 consensus/100% .....sTTCTTTsCsAs.....  
 consensus/90% .....sTTCTTTsCsAs.....  
 consensus/80% .....sTTCTTTsCsAs.....  
 consensus/70% .....sTTCTTTsCsAs.....

cov pid 3681  
 1 mmAtp7a3pUTR 100.0% 100.0% TAGATAGATAGATAGATAGATAGATTGATTcATGCCAAATCTTTACCAACTTTT/  
 2 hsATP7A3pUTR 84.7% 47.6% TTATTTTACAAAATAGAAAAATATAGATTcATGCCAAATATTACCTATTTT/  
 consensus/100% TsusTssAsAuAssuusAuAsAsATsGATTcATGCCAAATssTTACCsAsTTTT/  
 consensus/90% TsusTssAsAuAssuusAuAsAsATsGATTcATGCCAAATssTTACCsAsTTTT/  
 consensus/80% TsusTssAsAuAssuusAuAsAsATsGATTcATGCCAAATssTTACCsAsTTTT/  
 consensus/70% TsusTssAsAuAssuusAuAsAsATsGATTcATGCCAAATssTTACCsAsTTTT/

cov pid 3761  
 1 mmAtp7a3pUTR 100.0% 100.0% CTGGTATGAGTAGCTAGCTATAACACAAAGCATGAATTCTTATTTCTCAATCAC/  
 2 hsATP7A3pUTR 84.7% 47.6% CTGGTATGAGTAACCAGATAGAGCACAAAGCATGAGTTCTTGTTCTTCAGTTAA/  
 consensus/100% CTGGTATGAGTAuCsAGsTAsAuCACAAAGCATGAuTTCTTuTTssTCAuTsAs/  
 consensus/90% CTGGTATGAGTAuCsAGsTAsAuCACAAAGCATGAuTTCTTuTTssTCAuTsAs/  
 consensus/80% CTGGTATGAGTAuCsAGsTAsAuCACAAAGCATGAuTTCTTuTTssTCAuTsAs/  
 consensus/70% CTGGTATGAGTAuCsAGsTAsAuCACAAAGCATGAuTTCTTuTTssTCAuTsAs/

cov pid 3841  
 1 mmAtp7a3pUTR 100.0% 100.0% TAATTGACTTTTGTAGCCAGAGCCAGGTGTCTCAACCTTGTGTTTTTAAAGAAA1  
 2 hsATP7A3pUTR 84.7% 47.6% CAAATGCCTTTTGTAGCCAAAACCAGGCGTCTCAACCTTACGTTTTTAGTTAAAC  
 consensus/100% sAAsTGsCTTTTGTAGCCAuAuCCAGGsGTCTCAACCTTusGTTTTTAussAAA:  
 consensus/90% sAAsTGsCTTTTGTAGCCAuAuCCAGGsGTCTCAACCTTusGTTTTTAussAAA:  
 consensus/80% sAAsTGsCTTTTGTAGCCAuAuCCAGGsGTCTCAACCTTusGTTTTTAussAAA:  
 consensus/70% sAAsTGsCTTTTGTAGCCAuAuCCAGGsGTCTCAACCTTusGTTTTTAussAAA:

cov pid 3921  
 1 mmAtp7a3pUTR 100.0% 100.0% -----TTAGAATCCAAAACAGGAGCGGGCAACTTTGTGCAATATTTTCGT1  
 2 hsATP7A3pUTR 84.7% 47.6% CATTGATTGTTTGGTACCgAAAACAGCAGTGGACGATGTTGTGCAATATCCATC1  
 consensus/100% .....TTuGsAsCsAAAACAGsAGsGGuCuAssTTGTGCAATATsssss1  
 consensus/90% .....TTuGsAsCsAAAACAGsAGsGGuCuAssTTGTGCAATATsssss1  
 consensus/80% .....TTuGsAsCsAAAACAGsAGsGGuCuAssTTGTGCAATATsssss1  
 consensus/70% .....TTuGsAsCsAAAACAGsAGsGGuCuAssTTGTGCAATATsssss1

cov pid 4001  
 1 mmAtp7a3pUTR 100.0% 100.0% TGTTTTTTCTCATGTGCATGTAATTGATATTTCTGCCGAAGATGTGCCTTCAAC1  
 2 hsATP7A3pUTR 84.7% 47.6% TGTTTTTCATAAGCATGTAATTGATCATATTTCTGCCAAGGATGTGCCTTCAAC1  
 consensus/100% TGTTTTTTssTsAsssssssuTsusTsATATTTCTGCCuAuGATGTGCCTTCAAC1  
 consensus/90% TGTTTTTTssTsAsssssssuTsusTsATATTTCTGCCuAuGATGTGCCTTCAAC1  
 consensus/80% TGTTTTTTssTsAsssssssuTsusTsATATTTCTGCCuAuGATGTGCCTTCAAC1  
 consensus/70% TGTTTTTTssTsAsssssssuTsusTsATATTTCTGCCuAuGATGTGCCTTCAAC1

```

      cov   pid 4081      .      1      .      .
1 mmAtp7a3pUTR 100.0% 100.0% AAAAATGTTGTCAAGTGTGCTGCTGTTAAGTCATCCAGCCCCCTCTATCAGCAG/
2 hsATP7A3pUTR  84.7%  47.6% -----
  consensus/100% .....
  consensus/90%  .....
  consensus/80%  .....
  consensus/70%  .....

      cov   pid 4161      .      .      .      2      .
1 mmAtp7a3pUTR 100.0% 100.0% GTGGTTGTCTGGCTGTTGTTTCAGCTGTAAATCCGTGCTGTGTCAGGATCAGAG(
2 hsATP7A3pUTR  84.7%  47.6% -----
  consensus/100% .....
  consensus/90%  .....
  consensus/80%  .....
  consensus/70%  .....

      cov   pid 4241      :      .      .      .      .
1 mmAtp7a3pUTR 100.0% 100.0% CAAAAATCTGTTGTCTCTCAGATCCCGCTGCCCTGCTGCTGCTCACTTAGAACAC(
2 hsATP7A3pUTR  84.7%  47.6% -----
  consensus/100% .....
  consensus/90%  .....
  consensus/80%  .....
  consensus/70%  .....

      cov   pid 4321      .      .      :      .      ] 4367
1 mmAtp7a3pUTR 100.0% 100.0% TCTCCTTTGTAGTGTCTAATAAATTCTTGAGACGGTGTCTCCCCTCC
2 hsATP7A3pUTR  84.7%  47.6% -----
  consensus/100% .....
  consensus/90%  .....
  consensus/80%  .....
  consensus/70%  .....

```

**Supplementary Figure 3: Substantial conservation is observed in murine and human *ATP7A* 3' UTRs.** Multiple sequence alignment and consensus sequence of murine *Atp7a* 3' UTR (NM\_001109757) and human *ATP7A* 3' UTR (NM\_001282224) as visualized in MView.

# Figure S4

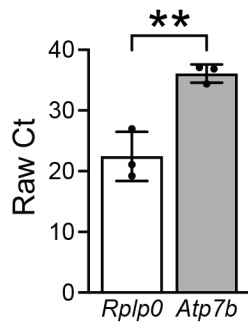

**Supplementary Figure 4: *Atp7b* is not detected in myoblasts.** Raw Ct values for qRT-PCR using primers to *Rplp0* and *Atp7b* in myoblasts showing Ct values for *Atp7b* at nearly undetectable levels above 30. Shown is mean  $\pm$  standard deviation for n = 3-4 experiments. Statistical significance was determined by t-test (\*\* p < 0.01).

# Figure S5

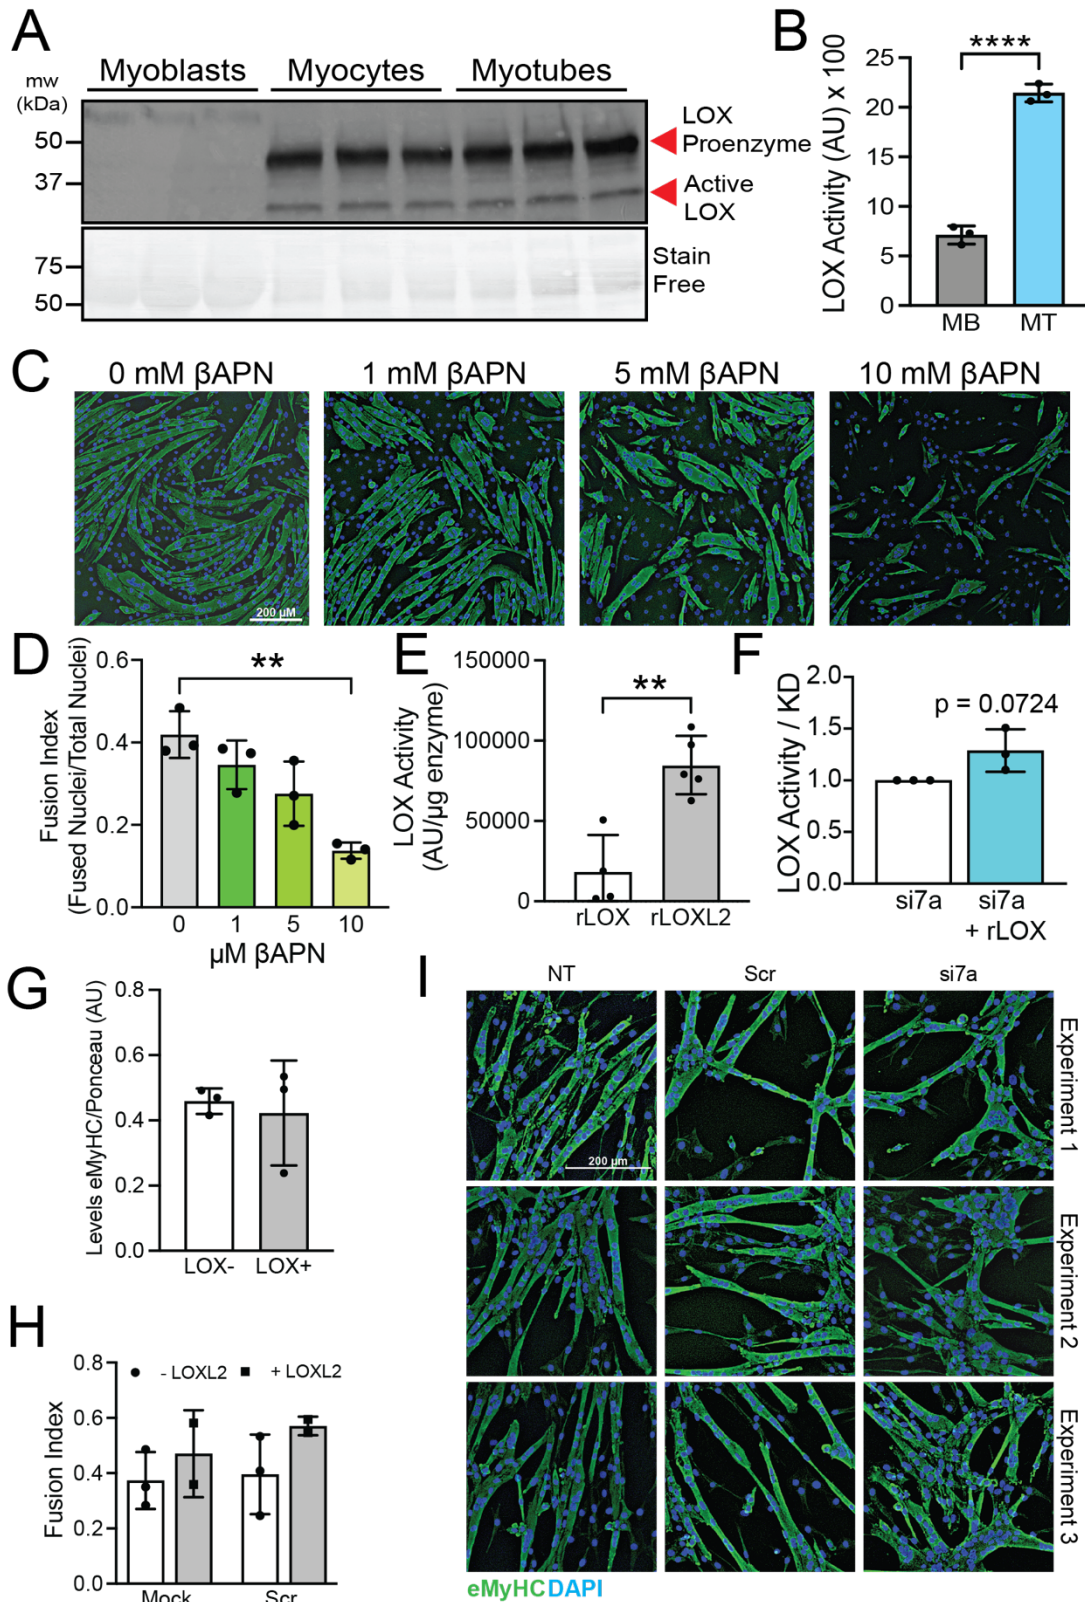

**Supplementary Figure 5: LOX activity is required for C2C12 myoblast differentiation.** *A)* Immunoblot of conditioned medium from C2C12 myoblasts (MB), myocytes (MC), and myotubes (MT) lysates probed with an antibody to LOX and with total protein shown using Stain-free gel technology. The LOX proenzyme is detected at ~45 kDa while process and active LOX is detected at ~30 kDa. *B)* LOX activity shown as arbitrary units (AU) x 100 showing increased activity in MT relative to MB. *C)* C2C12 myoblasts were induced to differentiate in the presence of 0, 1, 5, or 10 mM of the LOX inhibitor  $\beta$ APN and stained with an antibody to eMyHC and DAPI to visualize nuclei. *D)* Fusion index quantification revealing a significant decrease in myotube formation caused by LOX inhibition with  $\beta$ APN. *E)* In vitro activity of recombinant human LOX (rLOX) and recombinant human LOXL2 (rLOXL2) as AU x 100. *F)* Total LOX activity in *Atp7a* knockdown myotubes (si7a) versus knockdown myotubes with added rLOX (si7a + LOX) reported as fold change of knockdown. ***G)* Immunoblot quantification showing no change in levels of eMyHC in Scr myotubes with or without added LOX. *H)* Fusion index showing no change in non-treated or Scr myotubes with or without added LOXL2.** *I)* Additional representative images of NT, Scr, and si7a myoblasts differentiated on Matrigel showing three independent experiments stained with an antibody to eMyHC with nuclei stained with DAPI. Bar = 200  $\mu$ m. Shown is the mean  $\pm$  standard deviation for n = 3 experiments. Statistical significance was determined using t-test or one-way ANOVA (\*\* p < 0.01, \*\*\*\* p < 0.0001).

### Supplementary Table 1: Half-life of *Atp7a* RNA under various conditions

| Condition | T(1/2) | p*     |
|-----------|--------|--------|
| MB        | 5.37   | -      |
| MC        | 7.74   | 0.0075 |
| MT        | 8.86   | 0.16   |
| MB Cu     | 18.7   | 0.0005 |
| MB TEPA   | 6.56   | 0.66   |

\* Comparison to untreated MB

### Supplementary Table 2: Predicted protein binding sites in the proximal *ATP7A* 3' UTR

#### UTR

| RBP       | Prediction | RBS location             | Score | PhastCons score | Transcript ID   | Context |
|-----------|------------|--------------------------|-------|-----------------|-----------------|---------|
| HuR       | Deep bind  | chrX:77302350-77302400;+ | 0.364 | 0.593           | ENST00000343533 | UTR3    |
| HuR       | Deep bind  | chrX:77302650-77302700;+ | 0.21  | 0.419           | ENST00000343533 | UTR3    |
| HNRNPA1   | TESS       | chrX:77302300-77302350;0 | 0.198 | 0.703           | ENST00000343533 | UTR3    |
| HNRNPH1   | TESS       | chrX:77302550-77302600;0 | 0.751 | 1.638           | ENST00000343533 | UTR3    |
| HNRNPH1   | FIMO       | chrX:77304800-77304850;0 | 0.421 | 0.563           | ENST00000341514 | UTR3    |
| HNRNPH1   | FIMO       | chrX:77302400-77302450;0 | 0.26  | 0.788           | ENST00000350425 | UTR3    |
| HNRNPCL1  | TESS, FIMO | chrX:77302350-77302400;0 | 0.364 | 0.593           | ENST00000343533 | UTR3    |
| HNRNPCL1  | FIMO       | chrX:77302250-77302300;0 | 0.425 | 0.801           | ENST00000343533 | UTR3    |
| RBOX1     | Deep bind  | chrX:77302400-77302450;+ | 0.26  | 0.788           | ENST00000343533 | UTR3    |
| PABPC5    | TESS, FIMO | chrX:77302400-77302450;0 | 0.26  | 0.788           | ENST00000343533 | UTR3    |
| PTBP1     | TESS, FIMO | chrX:77302950-77303000;0 | 0.119 | 0.482           | ENST00000343533 | UTR3    |
| HNRNPC    | TESS, FIMO | chrX:77302350-77302400;0 | 0.364 | 0.593           | ENST00000343533 | UTR3    |
| HNRNPC    | FIMO       | chrX:77302250-77302300;0 | 0.425 | 0.801           | ENST00000343533 | UTR3    |
| HNRNPC    | FIMO       | chrX:77302150-77302200;0 | 0.113 | 0.488           | ENST00000343533 | UTR3    |
| PABPC4    | TESS, FIMO | chrX:77302350-77302400;0 | 0.364 | 0.593           | ENST00000343533 | UTR3    |
| QKI       | TESS, FIMO | chrX:77302250-77302300;0 | 0.425 | 0.801           | ENST00000343533 | UTR3    |
| YBX2      | TESS       | chrX:77302250-77302300;0 | 0.425 | 0.801           | ENST00000343533 | UTR3    |
| HNRNPA1L2 | TESS, FIMO | chrX:77302150-77302200;0 | 0.113 | 0.488           | ENST00000343533 | UTR3    |
| ESRP2     | FIMO       | chrX:77302500-77302550;0 | 0.056 | 0.456           | ENST00000343533 | UTR3    |

### Supplementary Table 3: Primary antibodies used in this study

| Antibody | Manufacturer information            | Experiment | Dilution |
|----------|-------------------------------------|------------|----------|
| eMyHC    | DSHB F1.652 hybridoma supernatant   | Stain      | 1:10     |
| eMyHC    | DSHB F1.652 bioreator supernatant   | Blot       | 1:10,000 |
| MYOG     | DSHB FD5 hybridoma supernatant      | Blot       | 1:100    |
| CCS      | Santa Cruz (H-7) sc-55561           | Blot       | 1:1000   |
| ATP7A    | Wang, et. al <i>Plos One</i> , 2012 | Blot       | 1:3000   |
| ATOX1    | Proteintech 226411-1-AP             | Blot       | 1:1000   |
| LOX      | Novus Biologicals #NB1002527SS      | Blot       | 1:1000   |

### Supplementary Table 4: Primers used in this study

| Primer name    | Sequence              |
|----------------|-----------------------|
| <i>Atp7a F</i> | CCAAGGGTGACTGGTGTT    |
| <i>Atp7a R</i> | GGCACTCACCACAGATGGAA  |
| <i>Myc F</i>   | CGCGATCAGCTCTCCTGAAA  |
| <i>Myc R</i>   | AAGTTCACGTTGAGGGGCAT  |
| <i>Atp7b F</i> | CCCAGGAAGAAGTGGCGTC   |
| <i>Atp7b R</i> | TTTGGGTGTGACCTGTCTCTC |
| <i>Myh3 F</i>  | TCTCTGTACAGTCAGAGGTGT |
| <i>Myh3 R</i>  | TTTTCCGACTTGCAGGAGAA  |
| <i>Myog F</i>  | CACTGGAGTTCGGTCCCAA   |
| <i>Myog R</i>  | TGTGGCGTCTGTAGGGTC    |
| <i>Acta1 F</i> | GCGACCTCACTGACTACCTG  |
| <i>Acta1 R</i> | GATGTCGCGCACAATCTCAC  |
